1 **Unveiling Prognostics Biomarkers of Tyrosine Metabolism Reprogramming in Liver Cancer**  
2 **by Cross-platform Gene Expression Analyses**

3 Tran Ngoc Nguyen<sup>1\*</sup>, Ha Quy Nguyen<sup>2</sup>, Duc-Hau Le<sup>1</sup>

4 1. Department of Computational Biomedicine, Big Data Institute, Vingroup, Hanoi, Vietnam

5 2. Department of Computer Vision, Big Data Institute, Vingroup, Hanoi, Vietnam

6 \* Corresponding author. Email: [v.tranNN3@vintech.net.vn](mailto:v.tranNN3@vintech.net.vn)

7

8

9 **Keywords:** hepatocellular carcinoma, tyrosine, microRNA, GSTZ1, metabolic reprogramming,  
10 pan-cancer, cross-platform

11

12

13

14

15

16

17

## 1 **Abstract**

2 Tyrosine is mainly degraded in the liver by a series of enzymatic reactions. Abnormal expression  
3 of the tyrosine catabolic enzyme tyrosine aminotransferase (TAT) has been reported in patients  
4 with hepatocellular carcinoma (HCC). Despite this, aberration in tyrosine metabolism has not been  
5 investigated in cancer development. In this work, we conduct comprehensive cross-platform study  
6 to obtain foundation for discoveries of potential therapeutics and preventative biomarkers of HCC.  
7 We explore data from The Cancer Genome Atlas (TCGA), Gene Expression Omnibus (GEO),  
8 Gene Expression Profiling Interactive Analysis (GEPIA), Oncomine and Kaplan Meier plotter  
9 (KM plotter) and performed integrated analyses to evaluate the clinical significance and prognostic  
10 values of the tyrosine catabolic genes in HCC. We find that five tyrosine catabolic enzymes are  
11 downregulated in HCC compared to normal liver at mRNA and protein level. Moreover, low  
12 expression of these enzymes correlates with poorer survival in patients with HCC. Notably, we  
13 identify pathways and upstream regulators that might involve in tyrosine catabolic reprogramming  
14 and further drive HCC development. In total, our results underscore tyrosine metabolism  
15 alteration in HCC and lay foundation for incorporating these pathway components in therapeutics  
16 and preventative strategies.

17

## 18 **Introduction**

19 Hepatocellular carcinoma (HCC) remains the most common cancer in the world, especially in Asia  
20 and Africa, and the third leading cause of cancer-related death worldwide<sup>1</sup>. It is believed that the  
21 pathogenesis of HCC is a long-term process that involves constant metabolic reprogramming.  
22 Previous efforts to investigate metabolic programming of HCC have largely focused on aerobic

1 glycolysis, commonly referred to as the Warburg effect, which supports tumor growth in part by  
2 accumulating glycolytic intermediates for anabolic biosynthesis<sup>2,3</sup>. For instance, HCC tumors  
3 express high levels of the hexokinase isoform 2 (HK2), which converts glucose to glucose-6-  
4 phosphate, and its expression is associated with the pathological stage of the tumor<sup>4,5</sup>. HK2  
5 silencing acted synergistically with sorafenib to inhibit HCC tumor growth in mice<sup>5</sup>. Besides  
6 glucose, HCC has been reported to alter its lipid and lipoprotein catabolic and anabolic pathways  
7 and increased HCC risks have been observed in patients with obesity<sup>6</sup>, diabetes<sup>7</sup>, and hepatic  
8 steatosis<sup>8</sup>. Recent studies defined a functional association among lipogenesis, multifunctional  
9 enzyme fatty acid synthase (FASN), sterol regulatory element-binding protein-1 (SREBP-1), a  
10 transcription factor regulating FASN expression, and HCC<sup>9,10</sup>.

11 Recently there are increasing evidences suggesting that cancer cells have increased levels of  
12 oxidative stress and ROS production compared to normal cells<sup>11</sup>. Thus, redox homeostasis is finely  
13 tuned in cancer cells with a role in the control of cell signaling and metabolism<sup>12</sup>. For instance,  
14 ROS-mediated inhibition of PKM2 allows cancer cells to sustain antioxidant responses by  
15 diverting glucose flux into the pentose phosphate pathway and increasing the production of  
16 reducing equivalents for ROS detoxification<sup>12</sup>. Oxidative damage is considered as a key pathway  
17 in HCC progression and increases patient vulnerability for HCC recurrence<sup>13</sup>. As previously  
18 reported, accumulation of a *m*-tyrosine may disrupt cellular homeostasis and contribute to disease  
19 pathogenesis and the elimination of this isomer can be an effective defense against oxidative  
20 stress<sup>14</sup>.

21 Tyrosine, like other amino acids, is the building block for proteins as well as an alternative energy  
22 source for cellular functions. Liver is the major organ where tyrosine degradation takes place to  
23 produce intermediates or precursors for gluconeogenesis and ketogenesis. The degradation of

1 tyrosine is catalyzed through a series of five enzymatic reactions. Disturbed tyrosine metabolism  
2 has been implicated in several types of disease such as Huntington's disease<sup>15</sup> and esophageal  
3 cancer<sup>16,17</sup>. Previously reported. patients with hereditary tyrosinemia are more likely to develop  
4 HCC<sup>18,19</sup>. In patients with HCC, an upregulation of serum tyrosine has been recorded<sup>20,21</sup>,  
5 suggesting a deregulated tyrosine metabolism in HCC. However, to date, there is a lack of  
6 systematic study to profile the state of tyrosine catabolic enzymes and molecular impacts of  
7 alteration in tyrosine catabolism in HCC development.

8 As previously reported, the frequent deletion of 16q22 and aberrant methylation led to the  
9 downregulation of the first tyrosine catabolic enzyme TAT (tyrosine aminotransferase)<sup>22</sup>.  
10 Functional analyses showed that TAT harbored proapoptotic effect and that TAT suppression  
11 could promote liver tumorigenesis<sup>22</sup>. Glutathione S-transferases (GSTs) are a family of phase II  
12 isoenzymes that detoxify toxicant to lower toxic<sup>23</sup> and its dysfunction has been found to be closely  
13 related with response to chemotherapy<sup>24-26</sup>. *GSTZ1* belongs to the zeta class of GSTs and is the  
14 fourth enzyme in tyrosine metabolism. Patients carrying *GSTZ1* variants had an increased risk of  
15 bladder cancer when exposed to trihalomethanes<sup>27</sup>. Furthermore, a computational-based  
16 investigation suggested *GSTZ1* might act as a protective factor in ovarian cancer<sup>28</sup>.

17 In this study, we aim to systematically investigate the expression and prognostic value of tyrosine  
18 catabolism enzymes (TAT, HPD, HGD, *GSTZ1* and FAH) in HCC by integrating large-scale  
19 datasets. We further detect enriched pathways associated with overexpression of a tyrosine  
20 catabolic enzyme in HCC cells. Our comprehensive, gene-centric analysis shed light on the  
21 genomic changes, clinical relevance, upstream regulators and possible impact of tyrosine catabolic  
22 genes on HCC development.

## 1 **Results**

### 2 **A cross-platform, pan-cancer analysis of tyrosine catabolic enzyme expression**

3 We first set out to investigate the expression profiles of tyrosine catabolic genes in cancer  
4 transcriptomes (Figure 1A). Here, we used the Oncomine online database<sup>29</sup> to perform pan-cancer  
5 transcriptome analysis on its available data sets. The top mRNA differences between cancer  
6 samples and normal samples were analyzed by default selective criteria. Figure 1B showed that  
7 there was a total of 390, 428, 431, 457 and 448 Oncomine data sets involving the genes, *TAT*,  
8 *HPD*, *HGD*, *GSTZ1* and *FAH*, respectively. Remarkably, in most data sets, a large proportion of  
9 patients demonstrated downregulation of these genes in the tumorous parts compared to those of  
10 normal samples. Specifically, in HCC, all of the gene sets show downregulation of the investigated  
11 tyrosine catabolic enzyme-encoding genes (Figure 1B, highlighted in red box). Furthermore, the  
12 Gene expression heat map from GEPIA pan-cancer transcriptome analysis<sup>30</sup> showed markedly  
13 downregulation of *TAT*, *HPD* and *GSTZ1* in HCC (Figure 1C). Additionally, in cervical squamous  
14 cell carcinoma, all of the tyrosine catabolic genes were visibly downregulated in tumors compared  
15 to normal tissue adjacent to the tumor. Through this initial observation, we found evidences to  
16 support that tyrosine catabolic genes expression were downregulated in many cancers, including  
17 HCC.

18

### 19 **Tyrosine catabolic genes are downregulated in HCC**

20 Next, to further investigate the role of tyrosine catabolic enzymes, we performed analysis of a  
21 publicly available dataset (The Cancer Genome Atlas<sup>31</sup> [TCGA], Liver Cancer [LIHC]) including  
22 gene expression in 369 HCC tissues vs 160 normal liver tissues. Here, the data demonstrated that  
23 *TAT*, *HPD* and *GTSZ1* were decreased in HCC tissues compared to normal liver (Figure 2A).

1 However, the gene expression of HGD and FAH were virtually unchanged in HCC samples  
2 compare to normal liver samples.

3 To gain supporting evidence on the downregulation of tyrosine catabolic genes in HCC, the  
4 GSE89377 (Data Citation 1) dataset was employed to assess the expression of these genes in  
5 normal liver samples, early HCC and HCC from stage 1 to 3. Interestingly, we found that in early  
6 HCC, the expression of tyrosine catabolic genes was insignificantly changed compared to normal  
7 liver. However, the transcripts of *TAT*, *HPD*, *HGD*, *GSTZ1* and *FAH* significantly reduced in the  
8 HCC stage 2 and stage 3 compared to normal liver (Figure 2B).

9 Overall, our combined analysis on TCGA data and an independent GSE dataset showed that  
10 tyrosine catabolic genes were downregulated in late stage HCC compared to normal liver.

11

## 12 **Prognostic value of tyrosine catabolic genes in patients with HCC**

13 Subsequently, we sought to determine the clinical relevance of *TAT*, *HPD*, *HGD*, *GSTZ1* and *FAH*  
14 expression in term of prognosis in HCC patients since these genes were highly enriched in liver  
15 tissues (Supplementary Figure S1). Kaplan–Meier analysis was employed to compare between the  
16 subgroups with high and low gene expression (using the median, 25% or 75% quartile values of  
17 gene expression as cut-off points) in TCGA-LIHC cohort of 364 liver cancer patients. The overall  
18 survival was significantly associated with *TAT*, *HGD* and *GSTZ1* expression in HCC samples  
19 ( $p = 0.0067$ ,  $p = 0.0039$  and  $p = 0.036$ , respectively) (Figure 3). Similarly, lower expression of  
20 *TAT*, *HGD* and *GSTZ1* could also translate to a worse disease-free survival in HCC patients  
21 ( $p = 0.011$ ,  $p = 0.0038$  and  $p = 0.036$ , respectively) (Supplementary Figure S2).

1 To further validate the potential application of tyrosine catabolic genes in the clinic, we extracted  
2 the characterized IHC images from the Human Protein Atlas. HCC tumor tissue staining of  
3 tyrosine catabolic enzymes showed significant decrease in positive staining compared with normal  
4 liver tissue. Specifically, HPD staining decreased by 2.26-fold  $\pm$  2.10 ( $p = 0.0388$ ), HGD decreased  
5 by 1.67-fold  $\pm$  0.87 ( $p = 0.0423$ ) and GSTZ1 decreased by 2.27-fold  $\pm$  1.09 ( $p = 0.0007$ ) in HCC  
6 tumor compared to normal liver tissue (Figure 4).

7 These findings highlighted that the expression of tyrosine catabolic enzyme-encoding genes  
8 correlated with worse overall survival and disease-free survival in HCC and that TAT, HGD and  
9 GSTZ1 had potential prognostic value in patients with HCC.

10

#### 11 **Gene expression profiling of GSTZ1 expressing HCC cell line**

12 Following the previous analyses, we noted that the fourth rate-limiting enzyme, GSTZ1  
13 (Glutathione S-transferase Zeta 1) had significant downregulation and prognosis. We therefore  
14 sought to study the molecular pathway alterations associated with this gene. Here, we explored the  
15 publicly available data set GSE117822 (Data Citation 2) where GSTZ1 is overexpressed in Huh7  
16 HCC cell line by adenoviral transfection. R software<sup>32</sup> with the DESeq2<sup>33</sup> package was applied to  
17 screen DEGs from the gene expression dataset GSE between control vectors and overexpressed  
18 GSTZ1. A total of 3163 DEGs ( $p < 0.05$ ) were identified from this dataset, 1742 upregulated genes  
19 and 1421 downregulated genes.

20 To investigate changes in molecular pathways associated with GSTZ1 overexpression, we use  
21 GSEA to rank the DEGs against the C2 canonical pathway gene set<sup>34</sup>. We were able to profile  
22 positively and negatively enriched pathways in GSTZ1 overexpressed Huh7 (Supplementary  
23 Figure S3). For better visualization of related gene sets and identification of important pathway

1 families, we presented the pathways using Enrichment Map<sup>35</sup> in Cytoscape<sup>36</sup> (Figure 5). As  
2 expected, we observed a positive enrichment for multiple metabolism related pathways including  
3 Metabolism of Lipids, Metabolism of Proteins and Metabolism of Amino Acids. Noticeably,  
4 increased GSTZ1 expression led to heightened Oxidative Phosphorylation and Respiratory  
5 Electron Transport. On the other hand, genes involved in glycolysis, such as *HK2*, *PDK2* were  
6 downregulated (1.88-fold and 2.05-fold, respectively) in cell expressing GSTZ1 compared with  
7 vector control. Most importantly, overexpression of GSTZ1 in HCC cell led to the downregulation  
8 in several pathways in cancer gene sets (Kegg Small Cell Lung Cancer and Kegg Chronic Myeloid  
9 Leukemia). Together, these data highlighted the changes in molecular pathways that correspond  
10 to GSTZ1 expression and critically, provided insights on how overexpression of GSTZ1 might  
11 negate HCC development.

12

### 13 **Mutation profiles of tyrosine catabolic genes in HCC**

14 We extended our studies to investigate on underlying mechanism of how tyrosine catabolic genes  
15 were downregulated in HCC. First, we explored mutation profiles of tyrosine catabolic genes in  
16 353 HCC patients by exploring TCGA data using cBioPortal<sup>37</sup>. We found that each individual gene  
17 was mutated in less than 1.1% of patients with HCC (Supplementary Figure S4). In all genes, there  
18 were 8/21 missense mutations that harbor deleterious effect (Table 1). However, when  
19 incorporating mutation type with mRNA expression profile, we did not observe a correlation  
20 where amplification led to increased expression or vice versa (Supplementary Figure S5). Second,  
21 we explored copy number status of tyrosine catabolic genes using data from GISTIC analysis<sup>38</sup>  
22 (TCGA Copy Number Portal). We found that even though the genes were located near the peak  
23 region of deletion, none of them were in focal (Table 2). Except for HPD (Q value = 0.019), the



1 rest of the genes were less likely to suffer copy number alterations (Table 2). Taken together, we  
2 found that several base substitution mutation scenarios can lead to the deletion of tyrosine catabolic  
3 genes but these is not a strong association between mutation status and mRNA expression.

4

### 5 **MicroRNAs regulate the expression of tyrosine catabolic genes**

6 Next, we sought out to explore microRNAs as possible negative regulators of *TAT*, *HPD*, *HGD*,  
7 *GSTZ1* and *FAH*. Using Target Scan database<sup>39</sup>, we found there were two microRNAs that targeted  
8 *TAT*, *HPD*, *GSTZ1* and *FAH* (Figure 6A), which were miR-539 and miR-661. There were no  
9 common microRNAs that target all tyrosine catabolic genes. First, investigation of 370 HCC  
10 samples and 50 normal samples (TCGA-LIHC) showed that miR-539 increased by 2.84-fold in  
11 HCC samples compared to normal liver ( $p = 0.05$ ). Second, pan-cancer co-expression analysis for  
12 miRNA-target interaction in HCC using starBase<sup>40</sup> showed that miR-539 level negatively  
13 correlated with *TAT*, *HPD*, *GSTZ1* and *FAH* expression ( $r = -0.221$ ,  $r = -0.193$ ,  $r = -0.123$ ,  $r = -$   
14  $0.166$ ) (Supplementary Figure S6). More importantly, our Kaplan-Meier analysis by KM-plotter<sup>41</sup>  
15 of TCGA-LIHC data set showed that high miR-539 expression led to worse overall survival in in  
16 HCC patients (Figure 6B).

17 Additionally, Kaplan-Meier analysis on CapitalBio miRNA Array liver dataset<sup>42</sup> also showed that  
18 miR-661 expression positively correlated with worse overall survival (Figure 6C). Overall, these  
19 findings suggested that in HCC, the downregulation of tyrosine catabolic genes can be due to  
20 microRNA regulation. We found that miR-539 and miR-661 can potentially suppress *TAT*, *HPD*,  
21 *GSTZ1* and *FAH* expression and that expression of miR-539 and miR-661 can provide prognostic  
22 insights for patients with HCC.

23

## 1 Discussion

2 We explored publicly available gene expression data sets and database to investigate the roles of  
3 genes in the tyrosine degradation pathway in the development of HCC. Our results indicated that  
4 all tyrosine catabolic genes decreased in HCC compared to normal liver tissues. Furthermore, we  
5 found that these genes gradually decreased from normal liver through early HCC to late HCC. We  
6 demonstrated that the fourth rate-limiting enzyme, GSTZ1 expression significantly reduced, either  
7 in protein or mRNA level, in HCC (Figure 2A, Figure 4). Even though the tyrosine catabolic gene  
8 expression remained unchanged at early stage HCC, they were significantly down-regulated in late  
9 stage HCC (Figure 2B). We also found that TAT, HGD and GSTZ1 expression levels positively  
10 correlated with overall survival and disease-free survival of HCC (Figure 3, Supplementary Figure  
11 S2). Previously shown, TAT, the first rate-limiting enzymes in the pathways, was downregulated  
12 in HCC, possibly due to the frequent deletion of 16q<sup>22,45</sup>. Another study found that aberrant DNA  
13 hypermethylation on chromosome 16 has been described as an early event in HCC  
14 tumorigenesis<sup>46</sup>. Functional *in vitro* validations showed that TAT induced apoptosis and that TAT  
15 possessed tumor-suppressive functions<sup>22</sup>.

16 GSTZ1, which is expressed in both hepatic cytosol and mitochondria, has shown to be oxidative  
17 stress-related<sup>28</sup>. High levels of GSTZ1 expression conferred resistance to the effect of anti-cancer  
18 therapy of dichloroacetate in hepatocellular carcinoma cell lines by an independent mechanism to  
19 tyrosine metabolism<sup>47,48</sup>. We decided to further study the roles of GSTZ1 in HCC development by  
20 exploring a public dataset where GSTZ1 were overexpressed in HCC cell line Huh7. We found  
21 that with the expression of GSTZ1, there was positive enrichment of Biological Oxidations (Figure  
22 5, Supplementary Figure S2). Generally, cell generates ATP through oxidative phosphorylation  
23 and produces ROS as a byproduct. Cancer cells have a higher tolerance for ROS and it is known

1 that low doses of ROS can stimulate growth in various types of cancer<sup>11</sup>. However, unbalanced  
2 increase in ROS level can induce cancer cell cycle arrest, senescence and apoptosis<sup>11</sup>. Here, it is  
3 appealing to assume that HCC can reprogram its tyrosine metabolism to maintain ROS balance as  
4 a growth strategy. Additionally, we detected an overall enrichment in metabolism of proteins and  
5 lipids pathways and decrease in glycolysis genes following *GSTZ1* expression (Figure 5). Liver is  
6 a dynamic organ which constantly undergoes metabolic shift. Cancer cells, including HCC, usually  
7 switch to aerobic glycolysis to maximize energy usage and further fuel growth<sup>2</sup>. Since  
8 overexpression of *GSTZ1* led to downregulation of several glycolysis genes, we consider it  
9 possible that the suppression of tyrosine catabolism can be a mechanism by which HCC switch to  
10 aerobic glycolysis during cancer progression.

11 The downregulation of other genes in the tyrosine catabolic pathways have not been linked to  
12 changes in DNA. Thus, we reason that the downregulation of *HPD*, *HGD*, *GSTZ1* and *FAH* might  
13 be dependent or independent of the downregulation of *TAT*. We found that four out of five genes  
14 were predicted to be regulated by miR-539, miR-661. Noticeably, investigation of TCGA-LIHC  
15 dataset showed that miR-539 significantly increased in HCC compared to normal skin and that the  
16 miR-539 level inversely correlated with expression of *TAT*, *GSTZ1*, *HPD*, *FAH* (Supplementary  
17 Figure S4). Here, our analyses showed that expression of two of these microRNAs positively  
18 correlated with overall survival in HCC patients (Figure 6B). As previously reported, miR-539  
19 was usually downregulated and acted as tumor suppressors in various tumor types<sup>49,50</sup>. In HCC,  
20 miR-539 was also demonstrated to suppress HCC development *in vitro* by targeting *FSCN1* and  
21 suppressing apoptosis<sup>51,52</sup>. Here, our findings suggested that on miR-539 might be a tumor  
22 promoter in contrast to previous experimental studies. On the other hand, prior studies showed that  
23 miR-661 was a tumor promoter in non-small cell lung cancer, colon cancer and ovarian cancer<sup>53-</sup>

1 <sup>55</sup>. However, the roles of miR-661 in HCC development has not been investigated. Taken together,  
2 we speculate that miR-539 and miR-661 can be potential regulators of tyrosine catabolic genes  
3 and whether these regulation lead to HCC development need to be validated by functional studies.  
4 Tyrosine metabolism is an important process that is often dysregulated in various diseases  
5 including cancers and chronic disorders<sup>56</sup>. Tyrosinemia type I patients have a higher risk of  
6 developing HCC<sup>56</sup>. The reasons for the high incidence of HCC are unknown but it has been  
7 suggested that it may be caused by accumulated metabolites such as fumarylacetoacetate (FAA)  
8 and maleylacetoacetate (MAA)<sup>56</sup>. A metabolomics study on esophageal cancer (EC) showed that  
9 tyrosine decreased in serum of patients with EC compared with healthy control<sup>57,58</sup>. There has been  
10 little evidence on how tyrosine metabolism might contribute to cancer development even though  
11 changes in expression of some tyrosine metabolic genes have been reported in HCC patients<sup>22,59</sup>.  
12 To summarize, our findings from the integrative databases and comprehensive analysis of this  
13 study demonstrated the downregulation of tyrosine catabolic genes and their prognostic value in  
14 HCC. We provided evidence on how suppressing these genes can benefit HCC development and  
15 that tyrosine catabolism is a novel pathway through which HCC reprogram its metabolism. Finally,  
16 we provided evidence suggesting that microRNAs can regulate the expression of tyrosine catabolic  
17 genes and might be a potential prognostic biomarker for HCC. However, more investigations need  
18 to be applied to fully reveal the role of tyrosine catabolism in HCC for further translational study.  
19 We further discovered that the expression of GSTZ1, the fourth rate limiting enzyme in tyrosine  
20 catabolism, regulates glycolytic gene expression. We provided evidence to support that tyrosine  
21 catabolic genes can be regulated by microRNAs. Thus, we present here a novel function for  
22 tyrosine catabolic genes in tumorigenesis and provide a previously unappreciated event by which  
23 cancer cells reprogram tyrosine metabolism during cancer progression.

## 1 **Methods**

### 2 **Oncomine analysis**

3 The Oncomine online databases<sup>29</sup> were accessed for the visualization of gene expression.  
4 Oncomine is an online cancer microarray database used to facilitate and promote discoveries from  
5 genome-wide expression analyses. The pan-cancer studies in Oncomine were selected to compare  
6 the expression levels in tumor vs normal tissue adjacent to the tumor. The selection criteria for the  
7 Oncomine studies were  $p < 0.05$  as a threshold, 2-fold change and gene rank in the top 10%. The  
8 p value, fold changes, and cancer subtypes were extracted.

9

### 10 **Gene expression analysis**

11 The TCGA data was analysed by GEPIA<sup>30</sup> (<http://gepia.cancer-pku.cn/>). For the differential  
12 expression analysis, the genes were  $\log_2(\text{TPM} + 1)$  transformed. One-way ANNOVA was used to  
13 compute p value. Those with  $\log_2(\text{TPM}+1) > 1$  and  $p < 0.01$  were then considered differentially  
14 expressed genes. Normal tissues are matched TCGA adjacent tissue and GTEx normal tissue.

15

### 16 **Survival analysis**

17 The overall survival curves of *TAT*, *HPD*, *HGD*, *GSTZ1* and *FAH* were investigated using the  
18 Kaplan-Meier method with the log-rank test. We set the high and low gene expression level  
19 groups by the median value. The overall survival plot was obtained with the hazard ratios (HR)  
20 and the 95% confidence interval information. The whole process was implemented using the  
21 web-based tool GEPIA<sup>30</sup>.

1 The prognostic values of hsa-miR-539 and has-miR-661 in HCC were analyzed using Kaplan  
2 Meier plotter (KM plotter) database<sup>44</sup>. In brief, the miRNAs were entered into the database, after  
3 which survival plots were generated and hazard ratio, 95% confidence intervals, log rank *P*-value  
4 were displayed on the webpage. The log-rank *p* value was calculated with <0.05 considered  
5 statistically significant.

6

### 7 **Gene expression omnibus data mining**

8 We retrieved transcriptome profiles of HCC tissues from GEO which is a public genomics  
9 database, allowing users to investigate gene expression profiles of interest<sup>60</sup>. The GSE89377 is a  
10 microarray dataset of multi-stage HCC in a GPL570 Affymetrix Human Genome U133 Plus 2.0  
11 Array Platform. The GSE89377 dataset contains 108 samples in total, including 13 healthy people,  
12 5 with early HCC, 9 with Stage 1 HCC, 12 with Stage 2 HCC and 14 with Stage 3 HCC.

13 Processed gene expression dataset was downloaded using *GEOquery*<sup>61</sup>. *limma*<sup>62</sup> R packages was  
14 used to determine the DEGs between normal and HCC tissues.  $p < 0.01$  was considered as the cutoff  
15 value.

16

### 17 **Differentially expressed genes identification and Gene set enrichment analysis (GSEA)**

18 The GSE89377 dataset published in 2017 was processed by Bioconductor package DESeq2<sup>33</sup> to  
19 identify DEGs and analyzed by GSEA with the Molecular Signatures Database “Canonical  
20 Pathways” gene set collection<sup>34</sup>. The default GSEA basic parameters were used; to find gene sets  
21 that correlate with *GSTZ1* expression profile (continuous phenotype label), Pearson metric was  
22 used for ranking genes.

23

## 1 **Quantification of immunohistochemistry images from Human Protein Atlas**

2 Immunohistochemistry (IHC) images were downloaded from the publicly available The Human  
3 Protein Atlas<sup>63</sup> (HPA; <http://www.proteinatlas.org>) version 8.0. The analyses in present study were  
4 performed using HPA images of liver sections that were labeled with antibodies for HPD (antibody  
5 HPA038321), HGD (antibody HPA047374), GSTZ1 (antibody HPA004701) and FAH (antibody  
6 HPA041370). A custom script written in MATLAB programming language was used to detect  
7 positive staining based on brown pixel-counting. The absolute amount of antibody-specific  
8 chromogen per pixel was determined and normalized against total tissue area. Code is available at  
9 <http://github.com/nguyenquyha/IHC-method>.

10

## 11 **Identify miRNA candidates by Targetscan**

12 Targetscan database (<http://www.targetscan.org>) were accessed for identifying miRNA  
13 candidates. In brief, gene name was entered to retrieve a list of microRNAs that was predicted to  
14 target the input gene. Default parameters were used. After that, the miRNA lists were merged to  
15 find common miRNAs that target *TAT*, *HPD*, *GSTZ1* and *FAH*.

16

## 17 **Copy Number Analysis**

18 Copy number alteration data from Gene-Centric GISTIC analyses was retrieved from TCGA Copy  
19 Number Portal (<http://portals.broadinstitute.org/tcga/home>). Liver hepatocarcinoma tumor type  
20 was selected for this analysis using the stddata\_\_2015\_04\_02 TCGA/GDAC tumor sample sets  
21 from FireHose.

22

## 1 **Statistical Analysis**

2 Statistical analyses were performed using GraphPad Prism 8.0.2. Independent Student's t test was  
3 used to compare the mean value of two groups. Bars and error represent mean  $\pm$  standard  
4 deviations (SD) of replicate measurements. Statistical significance was defined as  $p \leq 0.05$ . \* $p <$   
5  $0.05$ , \*\* $p < 0.01$  and \*\*\* $p < 0.001$ .

## 6 **Resource table**

| Software and Algorithms | Version | Source                                                                                                                                      |
|-------------------------|---------|---------------------------------------------------------------------------------------------------------------------------------------------|
| GraphPad PRISM          | 8.0.2   | <a href="https://www.graphpad.com">https://www.graphpad.com</a>                                                                             |
| R                       | 3.5.3   | <a href="https://www.r-project.org/">https://www.r-project.org/</a>                                                                         |
| limma R package         | 3.8     | <a href="https://bioconductor.org/packages/release/bioc/html/limma.html">https://bioconductor.org/packages/release/bioc/html/limma.html</a> |
| Cytoscape               | 3.7.1   | <a href="https://cytoscape.org/">https://cytoscape.org/</a>                                                                                 |
| EnrichmentMAP           | 3.2.0   | <a href="http://apps.cytoscape.org/apps/enrichmentmap">http://apps.cytoscape.org/apps/enrichmentmap</a>                                     |
| GEPIA                   | 1       | <a href="http://gepia.cancer-pku.cn">http://gepia.cancer-pku.cn</a>                                                                         |
| Oncomine                | NA      | <a href="https://www.oncomine.org">https://www.oncomine.org</a>                                                                             |
| KMPlotter               | NA      | <a href="https://kmplot.com">https://kmplot.com</a>                                                                                         |
| GSEA software           | 2-2.2.3 | <a href="http://software.broadinstitute.org/gsea/index.jsp">http://software.broadinstitute.org/gsea/index.jsp</a>                           |

7

## 8 **Conflict of Interest**



1 The authors declare that this study received funding from Vingroup. The funder was not involved  
2 in the study design, collection, analysis, interpretation of data, the writing of this article or the  
3 decision to submit it for publication.

4

## 5 **Acknowledgements**

6 We also thank Dr. Ban Xuan Dong at Institute for Molecular Engineering, University of Chicago  
7 for proof-reading the manuscript.

8

## 9 **Author Contributions**

10 T.N.N conceived the study, performed research, analyzed, interpreted the data and wrote the  
11 manuscript. H.Q.N contributed to the data analysis. D.H.L provided critical scientific input. The  
12 final manuscript was reviewed and approved by all listed authors.

13

## 14 **Figure Legends**

15 **Figure 1:** Downregulation of the tyrosine catabolic genes in several types of cancer, including  
16 HCC. (A) Graphics of tyrosine catabolism process. (B) The mRNA expression levels of the  
17 tyrosine catabolic genes according to Oncomine database. The mRNA expression of the genes  
18 (cancer versus normal tissue) in pan-cancers analyzed with the Oncomine database. The graphic  
19 demonstrates the numbers of datasets that meet our threshold in each cancer type. Cell color was  
20 defined as the gene rank percentile in the study. (C) The heat map indicates the expression after  
21 normalization by TPM+1 for comparison between tumor (T) and normal (N) across cancer types.

1 Normal tissues are matched TCGA adjacent tissue and GTEx data. The cancer abbreviation names  
2 are shown according to TCGA study abbreviations (Supplementary Table S1). TPM, transcript per  
3 million.

4  
5 **Figure 2:** Gene expression profile of the tyrosine catabolic genes in HCC. (A) Gene expression  
6 analysis of tyrosine catabolic genes using GEPIA based on the TCGA and GTEx database. Box  
7 plots represent the gene expression level in terms of  $\log_2(\text{TPM}+1)$  in the tumor (red, n=369) and  
8 normal (grey, n=160) samples, respectively. Normal tissues are matched TCGA adjacent tissue  
9 and GTEx data. The method for differential analysis is one-way ANOVA. (B) Gene expression  
10 analysis across stages of the tyrosine catabolic genes in GSE89377 dataset. Violin plots represent  
11  $\log_2(\text{TPM}+1)$  of genes in normal (grey, n= 13), early HCC (red, n=5), stage 1 HCC (red, n=9),  
12 stage 2 HCC (red, n=12) and stage 3 HCC (red, n=14). A t-test was used to compare the expression  
13 difference between tumor and normal tissue;  $p < 0.05$  was considered statistically significant.  
14 \* $p < 0.05$ , \*\* $p < 0.01$ , \*\*\* $p < 0.001$  based on the Student's t test. Values are mean  $\pm$  SEM. TPM,  
15 transcript per million.

16  
17 **Figure 3:** Overall survival outcomes of 364 HCC patients were analyzed using log-rank tests based  
18 on gene expression in HCC tissues from the TCGA cohort. Kaplan-Meier curves are plotted using  
19 GEPIA for TAT, HPD, HGD, GSTZ1 and FAH, and HRs and 95% confidence intervals are shown.  
20 Abbreviation: HCC, hepatocellular carcinoma, HRs, hazard ratios; TCGA, the Cancer Genome  
21 Atlas.

22

1 **Figure 4:** The protein expression profile of the tyrosine catabolic genes in the pan-cancer  
2 analysis (A) Quantification of HPD, HGD, GSTZ1 and FAH expression in IHC images obtained  
3 from HPA. A t-test was used to compare the expression difference between tumor and normal  
4 tissue adjacent to the tumor;  $p < 0.05$  was considered statistically significant.  $*p < 0.05$ ,  
5  $***p < 0.001$  based on the Student's t test. Values are mean  $\pm$  SEM. (B) Representative images of  
6 normal liver tissue and HCC tissue stained with antibody against GSTZ1.

7  
8 **Figure 5:** Enrichment Map of GSTZ1 overexpressed huh7 and non-targeted control: GSEA was  
9 used to obtain canonical pathway gene sets that were visualized using the Enrichment Map plug-  
10 in for Cytoscape. Each node represents a gene set with similar nodes clustered together and  
11 connected by edges with the number of known interactors between the nodes being represented by  
12 the thickness of edges. The size of each node denotes the gene set size for each specific.

13  
14 **Figure 6:** Prognostic value of microRNAs that target the tyrosine catabolic genes (A) The Venn  
15 diagram demonstrated the number of predicted miRNAs that target TAT, HPD, FAH and GSTZ1  
16 from TargetScan database. (B) Survival analysis with miR-539 and miR-661 (KM Plotter dataset).  
17 The TCGA-LIHC dataset<sup>43</sup> from Kaplan-Meier Plotter<sup>44</sup> was used to test for survival prediction  
18 capacity of miR-539 in liver cancer. The CapitalBio miRNA Array liver dataset<sup>42</sup> was used to test  
19 for survival prediction capacity of miR-661 in liver cancer. Cox regression model was used for  
20 each gene to predict relapse-free survival. Samples are divided into Low (black) and High (red)  
21 expression groups for each gene. Hazard ratio (HR) and p value for each association are shown  
22 within each plot.

23

1 **Table 1.** Summary of mutations of tyrosine catabolic genes in patients with HCC

| Gene  | DNA change                    | Type         | Consequences  | SIFT Impact |
|-------|-------------------------------|--------------|---------------|-------------|
| TAT   | chr16:g.71568080 G>C          | Substitution | 3 Prime UTR   | N/A         |
|       | chr16:g.71570753_71570754insG | Insertion    | Frameshift    | N/A         |
|       | chr16:g.71576063G>T           | Substitution | Intron        | N/A         |
|       | chr16:g.71568109A>T           | Substitution | 3 Prime UTR   | N/A         |
|       | chr16:g.71570812T>C           | Substitution | Missense      | Deleterious |
|       | chr16:g.71572596A>G           | Substitution | Synonymous    | N/A         |
|       | chr16:g.71568283C>A           | Substitution | Missense      | Deleterious |
| HPD   | chr12:g.121847089T>C          | Substitution | Missense      | Deleterious |
|       | chr12:g.121849748T>C          | Substitution | Missense      | Deleterious |
|       | chr12:g.121858824G>A          | Substitution | 5 Prime UTR   | N/A         |
| HGD   | chr3:g.120646351T>A           | Substitution | Missense      | Deleterious |
|       | chr3:g.120650834A>T           | Substitution | Missense      | Deleterious |
|       | chr3:g.120670454C>A           | Substitution | Missense      | Deleterious |
|       | chr3:g.120682178delTTCT       | Deletion     | 5 Prime UTR   | N/A         |
| GSTZ1 | chr14:g.77330329G>T           | Substitution | Missense      | N/A         |
| FAH   | chr15:g.80172237A>G           | Substitution | Missense      | Deleterious |
|       | chr15:g.80160464G>T           | Substitution | Splice Region | N/A         |
|       | chr15:g.80173063G>A           | Substitution | Synonymous    | N/A         |
|       | chr15:g.80186294G>T           | Substitution | 3 Prime UTR   | N/A         |
|       | chr15:g.80186299G>A           | Substitution | 3 Prime UTR   | N/A         |

|                     |              |        |     |
|---------------------|--------------|--------|-----|
| chr15:g.80162464C>T | Substitution | Intron | N/A |
|---------------------|--------------|--------|-----|

1

2 **Table 2.** Summary of CNAs of tyrosine catabolic genes in patients with HCC

| Gene name | Location                   | Nearest peak               | In peak? | Q-value    | Frequency of detection |        |            |
|-----------|----------------------------|----------------------------|----------|------------|------------------------|--------|------------|
|           |                            |                            |          |            | Overall                | Focal  | High value |
| TAT       | chr16:71600753-71610998    | chr16:78129906-79627535    | No       | 1          | 0.4108                 | 0.0135 | 0          |
| HPD       | chr12:12227743-2-122326517 | chr12:12345346-9-133155338 | No       | 0.019<br>1 | 0.1432                 | 0.0486 | 0          |
| HGD       | chr3:120347014-120401418   | chr3:114042610-115341566   | No       | 1          | 0.1135                 | 0.0081 | 0          |
| GSTZ1     | chr14:77787229-77797940    | chr14:66969095-67653632    | No       | 0.856      | 0.3405                 | 0.0324 | 0.0054     |
| FAH       | chr15:80445232-80478924    | chr15:88785838-101883952   | No       | 1          | 0.1892                 | 0.0189 | 0          |

3

#### 4 Data Citations

- 5 1. Gene Expression Omnibus GSE89377 (2017)
- 6 2. Gene Expression Omnibus GSE117822 (2019)

#### 7 References

- 8 1 Loeb, L. A. & Harris, C. C. Advances in chemical carcinogenesis: a historical review and  
9 prospective. *Cancer research* **68**, 6863-6872, doi:10.1158/0008-5472.Can-08-2852  
10 (2008).

- 1 2 Warburg, O. On the origin of cancer cells. *Science (New York, N.Y.)* **123**, 309-314 (1956).
- 2 3 Iansante, V. *et al.* PARP14 promotes the Warburg effect in hepatocellular carcinoma by  
3 inhibiting JNK1-dependent PKM2 phosphorylation and activation. *Nature*  
4 *communications* **6**, 7882, doi:10.1038/ncomms8882 (2015).
- 5 4 Gong, L. *et al.* Reduced survival of patients with hepatocellular carcinoma expressing  
6 hexokinase II. *Medical oncology (Northwood, London, England)* **29**, 909-914,  
7 doi:10.1007/s12032-011-9841-z (2012).
- 8 5 DeWaal, D. *et al.* Hexokinase-2 depletion inhibits glycolysis and induces oxidative  
9 phosphorylation in hepatocellular carcinoma and sensitizes to metformin. *Nature*  
10 *communications* **9**, 446, doi:10.1038/s41467-017-02733-4 (2018).
- 11 6 Gan, L., Liu, Z. & Sun, C. Obesity linking to hepatocellular carcinoma: A global view.  
12 *Biochimica et biophysica acta. Reviews on cancer* **1869**, 97-102,  
13 doi:10.1016/j.bbcan.2017.12.006 (2018).
- 14 7 Li, X., Wang, X. & Gao, P. Diabetes Mellitus and Risk of Hepatocellular Carcinoma.  
15 *BioMed research international* **2017**, 5202684, doi:10.1155/2017/5202684 (2017).
- 16 8 Borrelli, A. *et al.* Role of gut microbiota and oxidative stress in the progression of non-  
17 alcoholic fatty liver disease to hepatocarcinoma: Current and innovative therapeutic  
18 approaches. *Redox biology* **15**, 467-479, doi:10.1016/j.redox.2018.01.009 (2018).
- 19 9 Calvisi, D. F. *et al.* Increased lipogenesis, induced by AKT-mTORC1-RPS6 signaling,  
20 promotes development of human hepatocellular carcinoma. *Gastroenterology* **140**, 1071-  
21 1083, doi:10.1053/j.gastro.2010.12.006 (2011).
- 22 10 Na, T. Y. *et al.* Liver X receptor mediates hepatitis B virus X protein-induced lipogenesis  
23 in hepatitis B virus-associated hepatocellular carcinoma. *Hepatology (Baltimore, Md.)* **49**,  
24 1122-1131, doi:10.1002/hep.22740 (2009).
- 25 11 Liou, G. Y. & Storz, P. Reactive oxygen species in cancer. *Free radical research* **44**, 479-  
26 496, doi:10.3109/10715761003667554 (2010).
- 27 12 Anastasiou, D. *et al.* Inhibition of pyruvate kinase M2 by reactive oxygen species  
28 contributes to cellular antioxidant responses. *Science (New York, N.Y.)* **334**, 1278-1283,  
29 doi:10.1126/science.1211485 (2011).
- 30 13 Fitian, A. I. & Cabrera, R. Disease monitoring of hepatocellular carcinoma through  
31 metabolomics. *World journal of hepatology* **9**, 1-17, doi:10.4254/wjh.v9.i1.1 (2017).
- 32 14 Ipson, B. R. & Fisher, A. L. Roles of the tyrosine isomers meta-tyrosine and ortho-tyrosine  
33 in oxidative stress. *Ageing research reviews* **27**, 93-107, doi:10.1016/j.arr.2016.03.005  
34 (2016).
- 35 15 Herman, S. *et al.* Alterations in the tyrosine and phenylalanine pathways revealed by  
36 biochemical profiling in cerebrospinal fluid of Huntington's disease subjects. *Scientific*  
37 *reports* **9**, 4129, doi:10.1038/s41598-019-40186-5 (2019).
- 38 16 Lai, H. S., Lee, J. C., Lee, P. H., Wang, S. T. & Chen, W. J. Plasma free amino acid profile  
39 in cancer patients. *Seminars in cancer biology* **15**, 267-276,  
40 doi:10.1016/j.semcancer.2005.04.003 (2005).
- 41 17 Wiggins, T., Kumar, S., Markar, S. R., Antonowicz, S. & Hanna, G. B. Tyrosine,  
42 phenylalanine, and tryptophan in gastroesophageal malignancy: a systematic review.  
43 *Cancer epidemiology, biomarkers & prevention : a publication of the American*  
44 *Association for Cancer Research, cosponsored by the American Society of Preventive*  
45 *Oncology* **24**, 32-38, doi:10.1158/1055-9965.Epi-14-0980 (2015).

- 1 18 Kim, S. Z. *et al.* Hepatocellular carcinoma despite long-term survival in chronic  
2 tyrosinaemia I. *Journal of inherited metabolic disease* **23**, 791-804 (2000).
- 3 19 Russo, P. & O'Regan, S. Visceral pathology of hereditary tyrosinemia type I. *American*  
4 *journal of human genetics* **47**, 317-324 (1990).
- 5 20 Watanabe, A., Higashi, T., Sakata, T. & Nagashima, H. Serum amino acid levels in patients  
6 with hepatocellular carcinoma. *Cancer* **54**, 1875-1882, doi:10.1002/1097-  
7 0142(19841101)54:9<1875::aid-cnrcr2820540918>3.0.co;2-o (1984).
- 8 21 Hirayama, C., Suyama, K., Horie, Y., Tanimoto, K. & Kato, S. Plasma amino acid patterns  
9 in hepatocellular carcinoma. *Biochem Med Metab Biol* **38**, 127-133, doi:10.1016/0885-  
10 4505(87)90071-5 (1987).
- 11 22 Fu, L. *et al.* Down-regulation of tyrosine aminotransferase at a frequently deleted region  
12 16q22 contributes to the pathogenesis of hepatocellular carcinoma. *Hepatology (Baltimore,*  
13 *Md.)* **51**, 1624-1634, doi:10.1002/hep.23540 (2010).
- 14 23 Chasseaud, L. F. The role of glutathione and glutathione S-transferases in the metabolism  
15 of chemical carcinogens and other electrophilic agents. *Advances in cancer research* **29**,  
16 175-274 (1979).
- 17 24 Lee, W. H. *et al.* Cytidine methylation of regulatory sequences near the pi-class glutathione  
18 S-transferase gene accompanies human prostatic carcinogenesis. *Proceedings of the*  
19 *National Academy of Sciences of the United States of America* **91**, 11733-11737 (1994).
- 20 25 Niu, D., Zhang, J., Ren, Y., Feng, H. & Chen, W. N. HBx genotype D represses GSTP1  
21 expression and increases the oxidative level and apoptosis in HepG2 cells. *Molecular*  
22 *oncology* **3**, 67-76, doi:10.1016/j.molonc.2008.10.002 (2009).
- 23 26 Zhang, Y. J. *et al.* Silencing of glutathione S-transferase P1 by promoter hypermethylation  
24 and its relationship to environmental chemical carcinogens in hepatocellular carcinoma.  
25 *Cancer letters* **221**, 135-143, doi:10.1016/j.canlet.2004.08.028 (2005).
- 26 27 Cantor, K. P. *et al.* Polymorphisms in GSTT1, GSTZ1, and CYP2E1, disinfection by-  
27 products, and risk of bladder cancer in Spain. *Environmental health perspectives* **118**,  
28 1545-1550, doi:10.1289/ehp.1002206 (2010).
- 29 28 Zhang, J. *et al.* A panel of three oxidative stress-related genes predicts overall survival in  
30 ovarian cancer patients received platinum-based chemotherapy. *Aging* **10**, 1366-1379,  
31 doi:10.18632/aging.101473 (2018).
- 32 29 Rhodes, D. R. *et al.* ONCOMINE: a cancer microarray database and integrated data-mining  
33 platform. *Neoplasia (New York, N.Y.)* **6**, 1-6 (2004).
- 34 30 Tang, Z. *et al.* GEPIA: a web server for cancer and normal gene expression profiling and  
35 interactive analyses. *Nucleic acids research* **45**, W98-w102, doi:10.1093/nar/gkx247  
36 (2017).
- 37 31 Weinstein, J. N. *et al.* The Cancer Genome Atlas Pan-Cancer analysis project. *Nature*  
38 *genetics* **45**, 1113-1120, doi:10.1038/ng.2764 (2013).
- 39 32 R: A Language and Environment for Statistical Computing v. R 3.5.3 (2019).
- 40 33 Love, M. I., Huber, W. & Anders, S. Moderated estimation of fold change and dispersion  
41 for RNA-seq data with DESeq2. *Genome biology* **15**, 550, doi:10.1186/s13059-014-0550-8  
42 (2014).
- 43 34 Subramanian, A. *et al.* Gene set enrichment analysis: a knowledge-based approach for  
44 interpreting genome-wide expression profiles. *Proceedings of the National Academy of*  
45 *Sciences of the United States of America* **102**, 15545-15550, doi:10.1073/pnas.0506580102  
46 (2005).



- 1 35 Merico, D., Isserlin, R., Stueker, O., Emili, A. & Bader, G. D. Enrichment map: a network-  
2 based method for gene-set enrichment visualization and interpretation. *PLoS one* **5**, e13984,  
3 doi:10.1371/journal.pone.0013984 (2010).
- 4 36 Shannon, P. *et al.* Cytoscape: a software environment for integrated models of  
5 biomolecular interaction networks. *Genome Res* **13**, 2498-2504, doi:10.1101/gr.1239303  
6 (2003).
- 7 37 Cerami, E. *et al.* The cBio cancer genomics portal: an open platform for exploring  
8 multidimensional cancer genomics data. *Cancer discovery* **2**, 401-404, doi:10.1158/2159-  
9 8290.Cd-12-0095 (2012).
- 10 38 Mermel, C. H. *et al.* GISTIC2.0 facilitates sensitive and confident localization of the targets  
11 of focal somatic copy-number alteration in human cancers. *Genome biology* **12**, R41,  
12 doi:10.1186/gb-2011-12-4-r41 (2011).
- 13 39 Garcia, D. M. *et al.* Weak seed-pairing stability and high target-site abundance decrease  
14 the proficiency of lsy-6 and other microRNAs. *Nature structural & molecular biology* **18**,  
15 1139-1146, doi:10.1038/nsmb.2115 (2011).
- 16 40 Li, J. H., Liu, S., Zhou, H., Qu, L. H. & Yang, J. H. starBase v2.0: decoding miRNA-  
17 ceRNA, miRNA-ncRNA and protein-RNA interaction networks from large-scale CLIP-  
18 Seq data. *Nucleic acids research* **42**, D92-97, doi:10.1093/nar/gkt1248 (2014).
- 19 41 Lanczky, A. *et al.* miRpower: a web-tool to validate survival-associated miRNAs utilizing  
20 expression data from 2178 breast cancer patients. *Breast cancer research and treatment*  
21 **160**, 439-446, doi:10.1007/s10549-016-4013-7 (2016).
- 22 42 Li, W. *et al.* Diagnostic and prognostic implications of microRNAs in human  
23 hepatocellular carcinoma. *International journal of cancer* **123**, 1616-1622,  
24 doi:10.1002/ijc.23693 (2008).
- 25 43 Comprehensive and Integrative Genomic Characterization of Hepatocellular Carcinoma.  
26 *Cell* **169**, 1327-1341.e1323, doi:10.1016/j.cell.2017.05.046 (2017).
- 27 44 Nagy, A., Lanczky, A., Menyhart, O. & Gyorffy, B. Validation of miRNA prognostic  
28 power in hepatocellular carcinoma using expression data of independent datasets. *Scientific*  
29 *reports* **8**, 9227, doi:10.1038/s41598-018-27521-y (2018).
- 30 45 Piao, Z., Park, C., Kim, J. J. & Kim, H. Deletion mapping of chromosome 16q in  
31 hepatocellular carcinoma. *British journal of cancer* **80**, 850-854,  
32 doi:10.1038/sj.bjc.6690431 (1999).
- 33 46 Kanai, Y. *et al.* Aberrant DNA methylation on chromosome 16 is an early event in  
34 hepatocarcinogenesis. *Japanese journal of cancer research : Gann* **87**, 1210-1217 (1996).
- 35 47 Jahn, S. C. *et al.* GSTZ1 expression and chloride concentrations modulate sensitivity of  
36 cancer cells to dichloroacetate. *Biochimica et biophysica acta* **1860**, 1202-1210,  
37 doi:10.1016/j.bbagen.2016.01.024 (2016).
- 38 48 James, M. O. *et al.* Therapeutic applications of dichloroacetate and the role of glutathione  
39 transferase zeta-1. *Pharmacology & therapeutics* **170**, 166-180,  
40 doi:10.1016/j.pharmthera.2016.10.018 (2017).
- 41 49 Zhao, J., Xu, J. & Zhang, R. MicroRNA-539 inhibits colorectal cancer progression by  
42 directly targeting SOX4. *Oncology letters* **16**, 2693-2700, doi:10.3892/ol.2018.8892  
43 (2018).
- 44 50 Zhang, H. *et al.* miR-539 inhibits prostate cancer progression by directly targeting SPAG5.  
45 *Journal of experimental & clinical cancer research : CR* **35**, 60, doi:10.1186/s13046-016-  
46 0337-8 (2016).



- 1 51 Liu, Y. *et al.* miR-539 inhibits FSCN1 expression and suppresses hepatocellular carcinoma  
2 migration and invasion. *Oncology reports* **37**, 2593-2602, doi:10.3892/or.2017.5549  
3 (2017).
- 4 52 Zhu, C., Zhou, R., Zhou, Q., Chang, Y. & Jiang, M. microRNA-539 suppresses tumor  
5 growth and tumorigenesis and overcomes arsenic trioxide resistance in hepatocellular  
6 carcinoma. *Life sciences* **166**, 34-40, doi:10.1016/j.lfs.2016.10.002 (2016).
- 7 53 Gomez de Cedron, M. *et al.* MicroRNA-661 modulates redox and metabolic homeostasis  
8 in colon cancer. *Molecular oncology* **11**, 1768-1787, doi:10.1002/1878-0261.12142  
9 (2017).
- 10 54 Liu, F. *et al.* MiR-661 promotes tumor invasion and metastasis by directly inhibiting RB1  
11 in non small cell lung cancer. *Molecular cancer* **16**, 122, doi:10.1186/s12943-017-0698-4  
12 (2017).
- 13 55 Zhu, T. *et al.* MiR-661 contributed to cell proliferation of human ovarian cancer cells by  
14 repressing INPP5J expression. *Biomedicine & pharmacotherapy = Biomedecine &*  
15 *pharmacotherapie* **75**, 123-128, doi:10.1016/j.biopha.2015.07.023 (2015).
- 16 56 Tanguay, R. M., Jorquera, R., Poudrier, J. & St-Louis, M. Tyrosine and its catabolites:  
17 from disease to cancer. *Acta biochimica Polonica* **43**, 209-216 (1996).
- 18 57 Cheng, J., Zheng, G., Jin, H. & Gao, X. Towards Tyrosine Metabolism in Esophageal  
19 Squamous Cell Carcinoma. *Combinatorial chemistry & high throughput screening* **20**,  
20 133-139, doi:10.2174/1386207319666161220115409 (2017).
- 21 58 Zhang, J. *et al.* Esophageal cancer metabolite biomarkers detected by LC-MS and NMR  
22 methods. *PloS one* **7**, e30181, doi:10.1371/journal.pone.0030181 (2012).
- 23 59 Cheng, Z. *et al.* Conversion of hepatoma cells to hepatocyte-like cells by defined  
24 hepatocyte nuclear factors. *Cell research* **29**, 124-135, doi:10.1038/s41422-018-0111-x  
25 (2019).
- 26 60 Barrett, T. *et al.* NCBI GEO: archive for functional genomics data sets--update. *Nucleic*  
27 *acids research* **41**, D991-D995, doi:10.1093/nar/gks1193 (2013).
- 28 61 Davis, S. & Meltzer, P. S. GEOquery: a bridge between the Gene Expression Omnibus  
29 (GEO) and BioConductor. *Bioinformatics* **23**, 1846-1847,  
30 doi:10.1093/bioinformatics/btm254 (2007).
- 31 62 Ritchie, M. E. *et al.* limma powers differential expression analyses for RNA-sequencing  
32 and microarray studies. *Nucleic acids research* **43**, e47-e47, doi:10.1093/nar/gkv007  
33 (2015).
- 34 63 Uhlen, M. *et al.* Proteomics. Tissue-based map of the human proteome. *Science (New York,*  
35 *N.Y.)* **347**, 1260419, doi:10.1126/science.1260419 (2015).

bioRxiv preprint doi: <https://doi.org/10.1101/2020.02.05.935429>; this version posted February 5, 2020. The copyright holder for this preprint (which was not certified by peer review) is the author/funder, who has granted bioRxiv a license to display the preprint in perpetuity. It is made available under aCC-BY 4.0 International license.

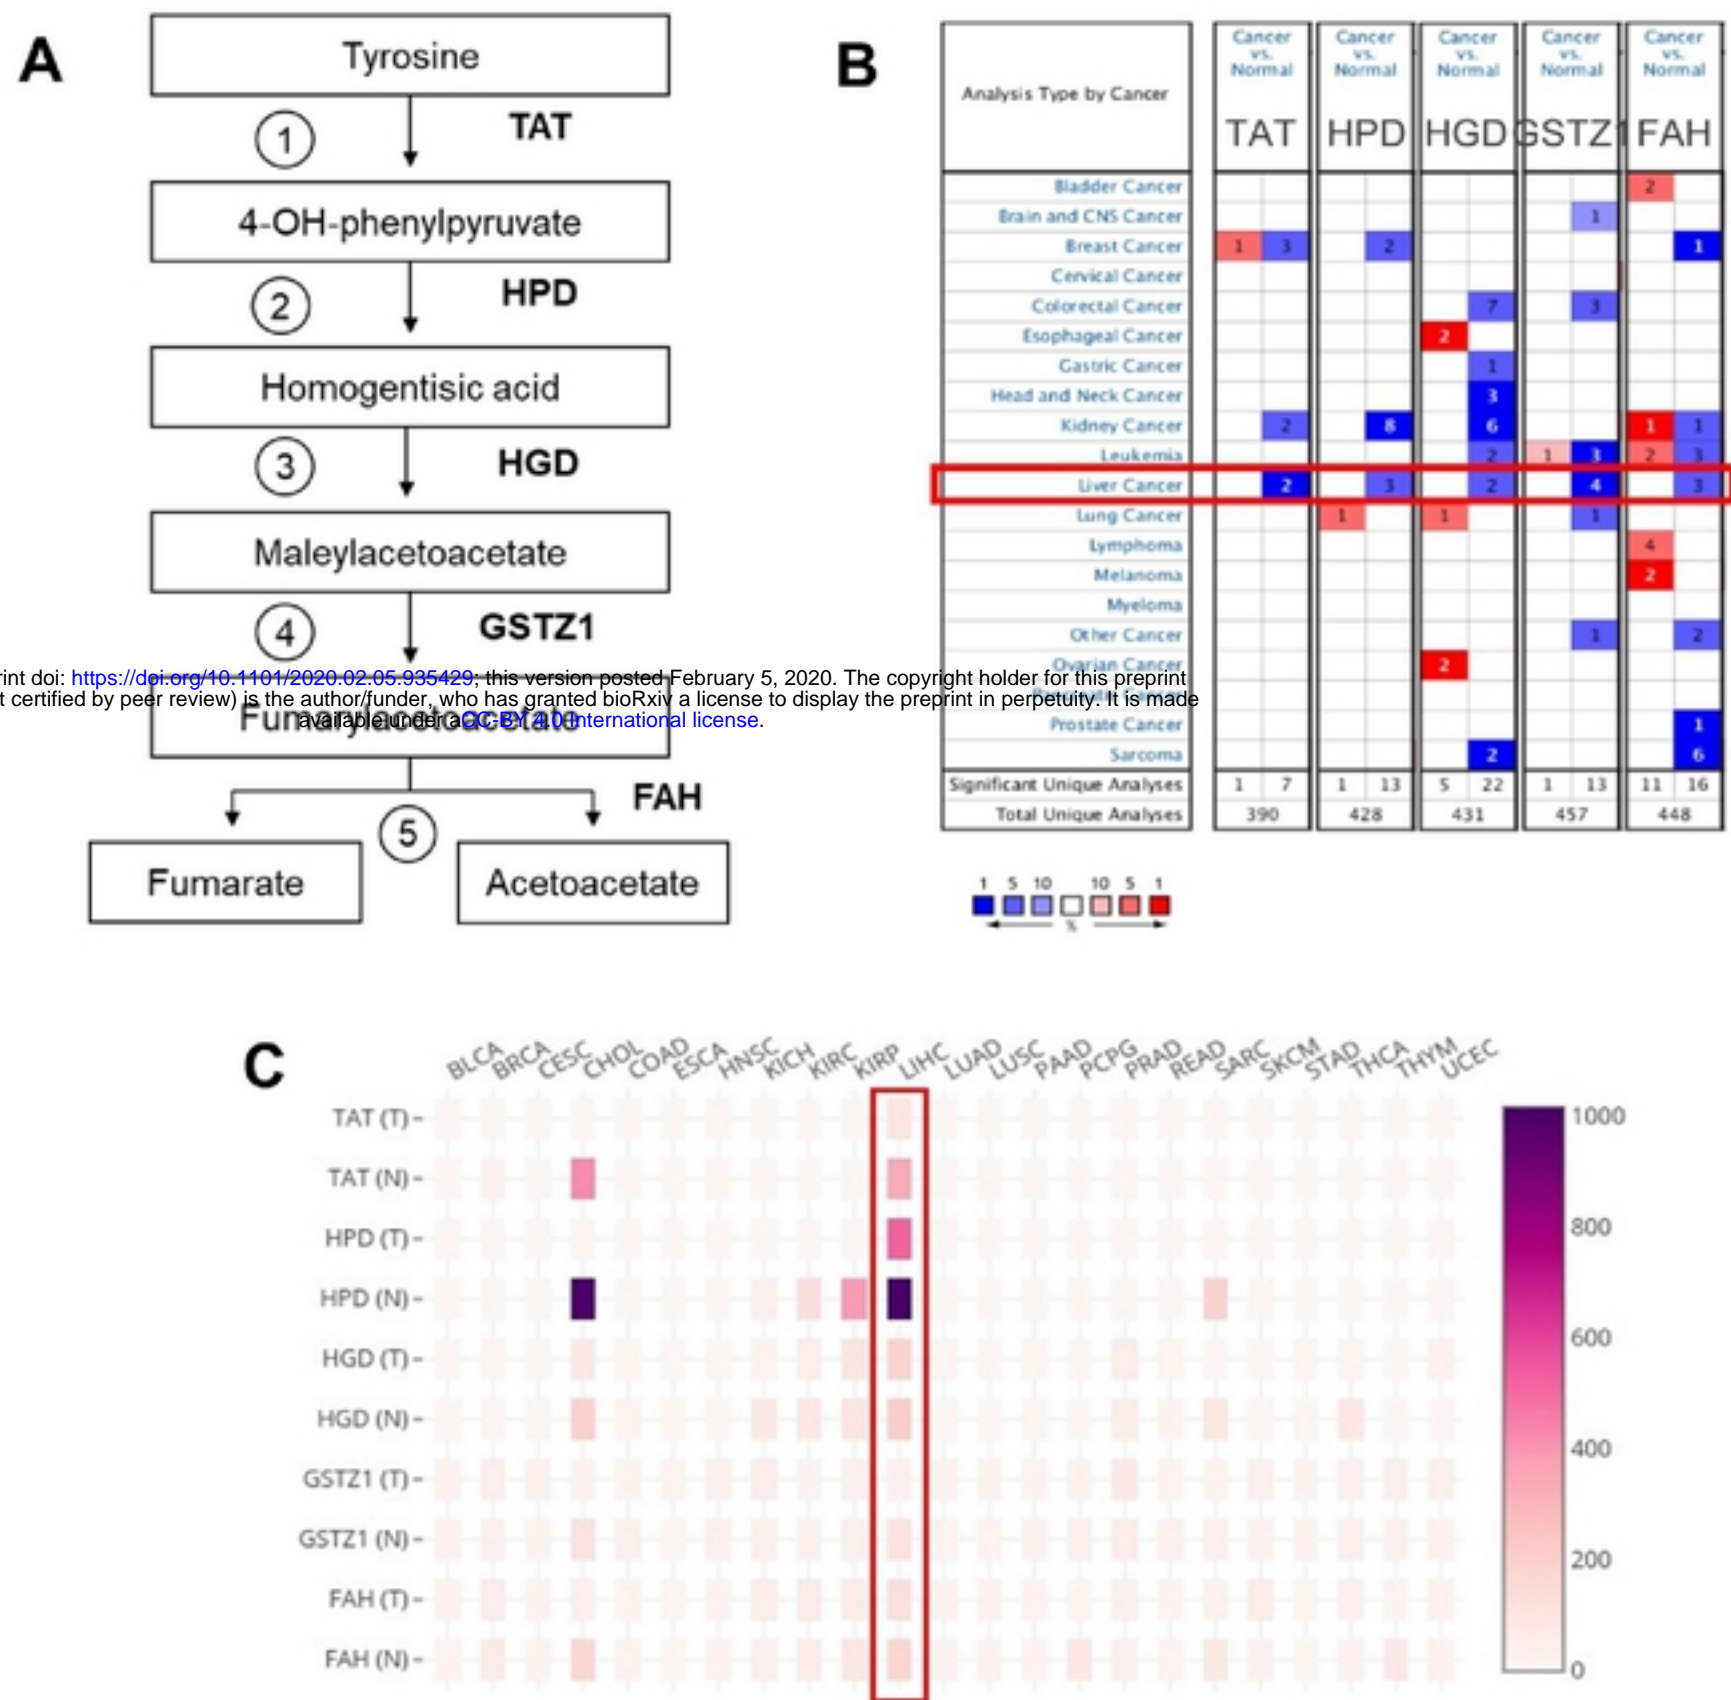

**Figure 1:** Downregulation of the tyrosine catabolic genes in several types of cancer, including HCC. (A) Graphics of tyrosine catabolism process. (B) The mRNA expression levels of the tyrosine catabolic genes according to OncoPrint database. The mRNA expression of the genes (cancer versus normal tissue) in pan-cancers analyzed with the OncoPrint database. The graphic demonstrates the numbers of datasets that meet our threshold in each cancer type. Cell color was defined as the gene rank percentile in the study. (C) The heatmap indicates the expression after normalization by TPM+1 for comparison between tumor (T) and normal (N) across cancer types. Normal tissues are matched TCGA adjacent tissue and GTEx data. The cancer abbreviation names are shown according to TCGA study abbreviations (Supplementary Table S1). TPM, transcript per million.

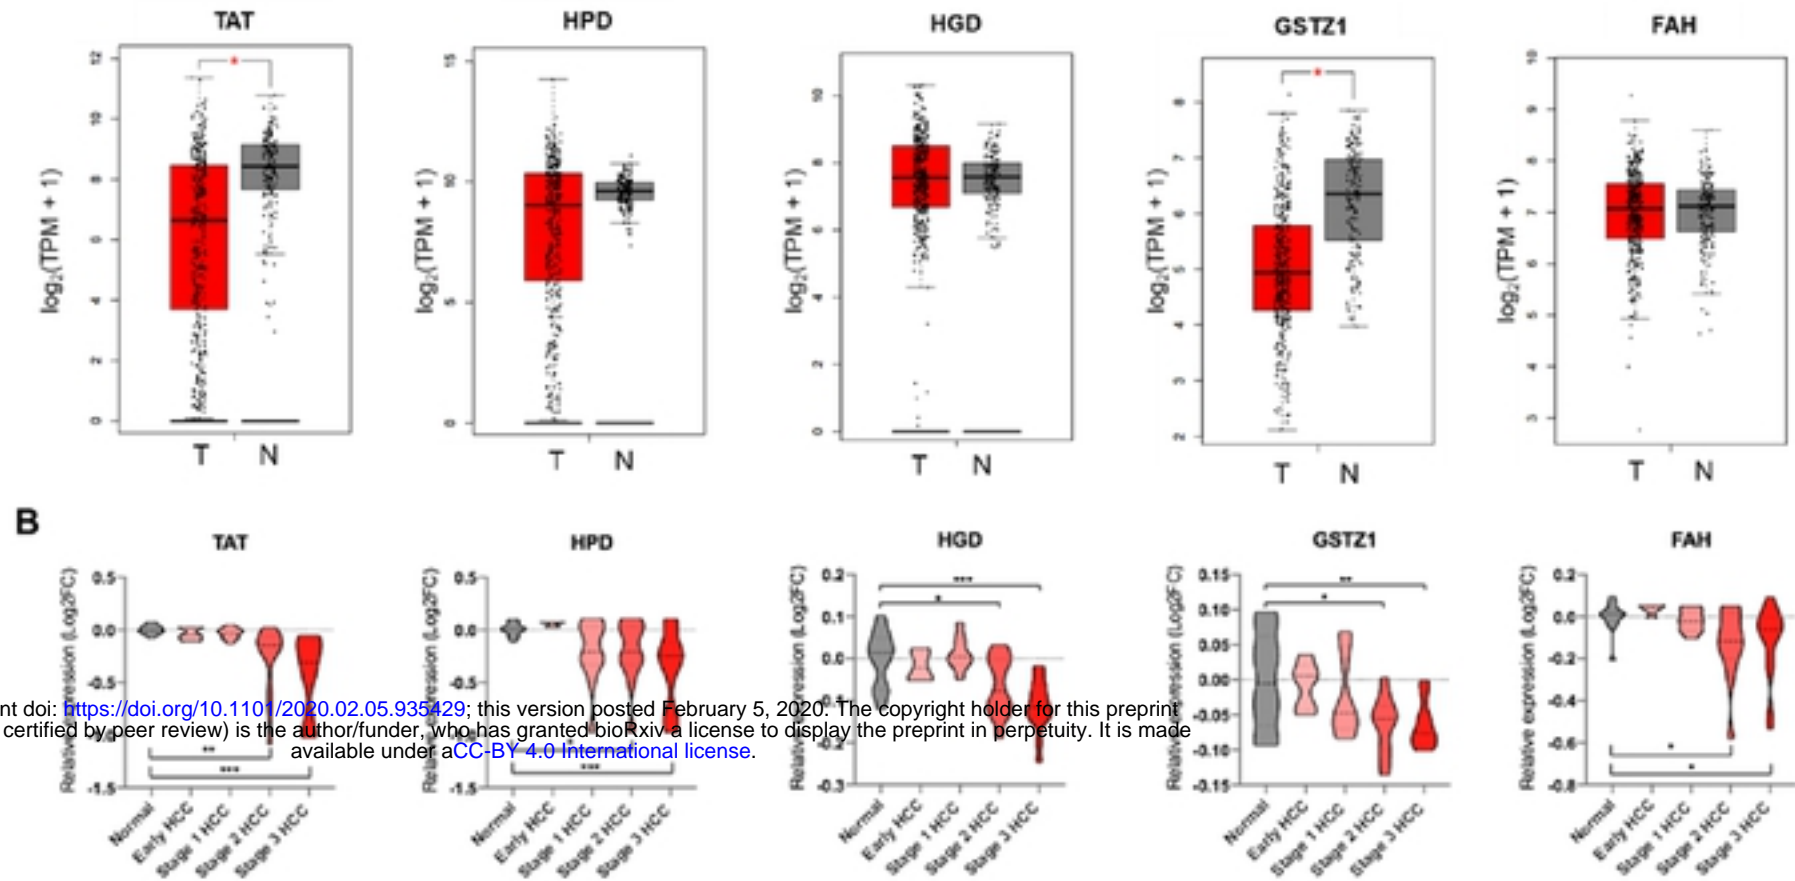

**Figure 2:** Gene expression profile of the tyrosine catabolic genes in HCC. (A) Gene expression analysis of tyrosine catabolic genes using GEPIA based on the TCGA and GTEx database. Box plots represent the gene expression level in terms of  $\log_2(\text{TPM}+1)$  in the tumor (red,  $n=369$ ) and normal (grey,  $n=160$ ) samples, respectively. Normal tissues are matched TCGA adjacent tissue and GTEx data. The method for differential analysis is one-way ANOVA. (B) Gene expression analysis across stages of the tyrosine catabolic genes in GSE89377 dataset. Violin plots represent  $\log_2(\text{TPM}+1)$  of genes in normal (grey,  $n=13$ ), early HCC (red,  $n=5$ ), stage 1 HCC (red,  $n=9$ ), stage 2 HCC (red,  $n=12$ ) and stage 3 HCC (red,  $n=14$ ). A t-test was used to compare the expression difference between tumor and normal tissue;  $p < 0.05$  was considered statistically significant. \* $p < 0.05$ , \*\* $p < 0.01$ , \*\*\* $p < 0.001$  based on the Student's t test. Values are mean  $\pm$  SEM. TPM, transcript per million.



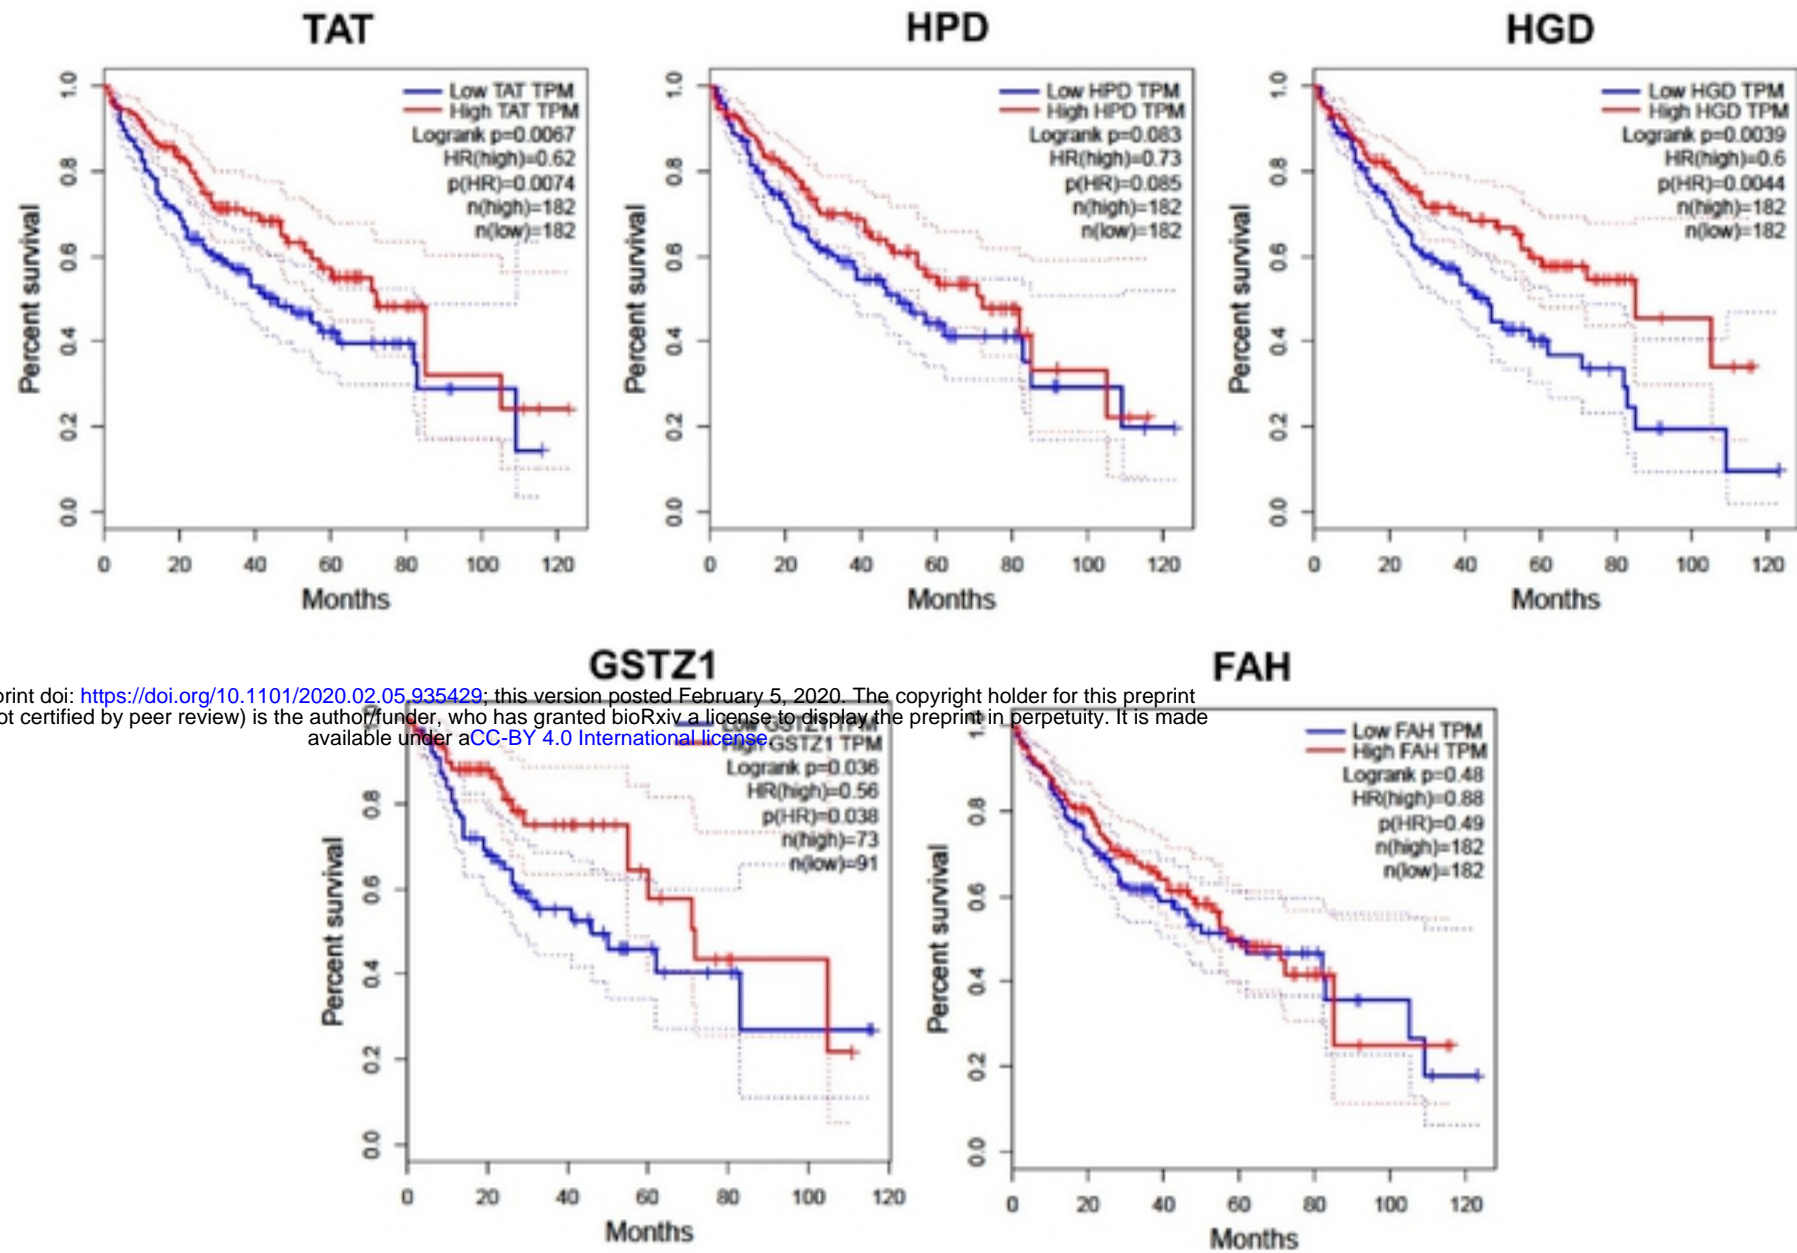

bioRxiv preprint doi: <https://doi.org/10.1101/2020.02.05.935429>; this version posted February 5, 2020. The copyright holder for this preprint (which was not certified by peer review) is the author/funder, who has granted bioRxiv a license to display the preprint in perpetuity. It is made available under aCC-BY 4.0 International license.

**Figure 3:** Overall survival outcomes of 364 HCC patients were analyzed using log-rank tests based on gene expression in HCC tissues from the TCGA cohort. Kaplan-Meier curves are plotted using GEPIA for TAT, HPD, HGD, GSTZ1 and FAH, and HRs and 95% confidence intervals are shown. Abbreviation: HCC, hepatocellular carcinoma, HRs, hazard ratios; TCGA, the Cancer Genome Atlas.

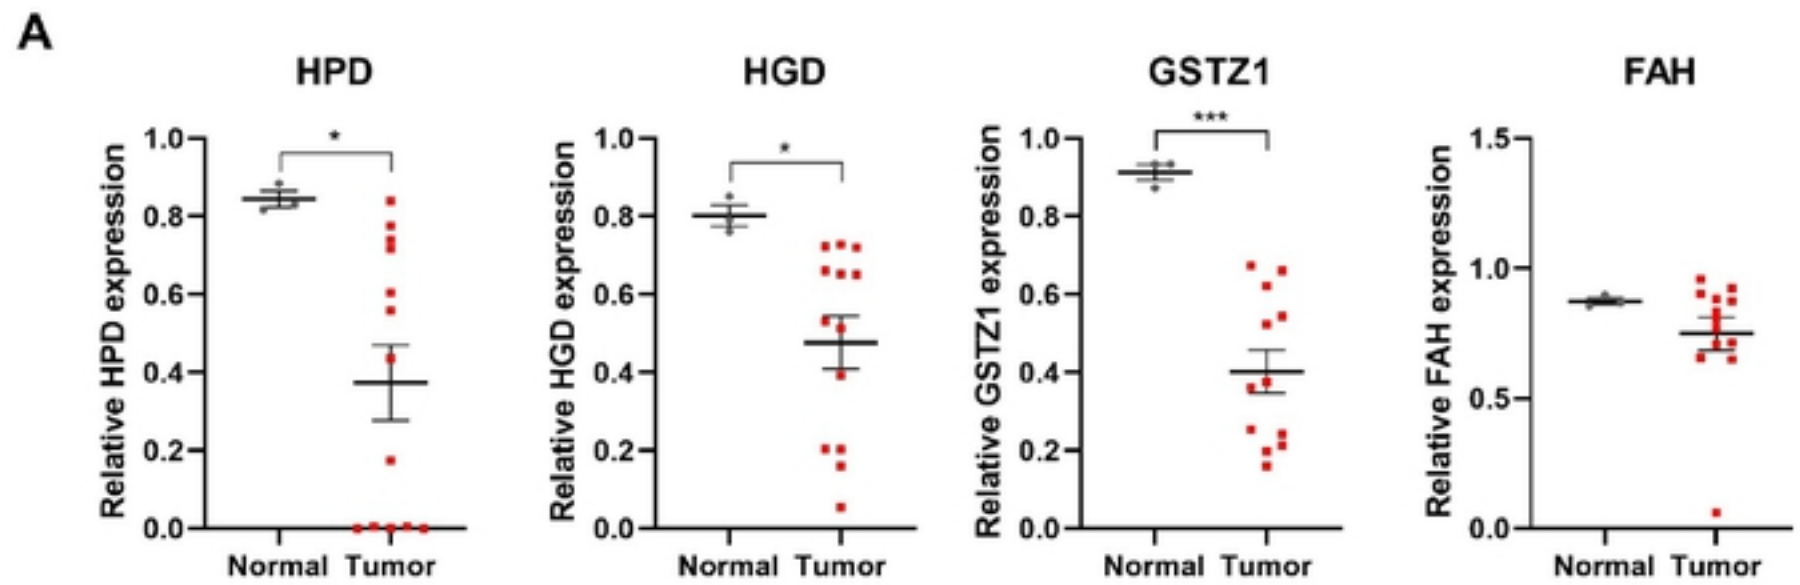

**B**  
 bioRxiv preprint doi: <https://doi.org/10.1101/2020.02.05.935429>; this version posted February 5, 2020. The copyright holder for this preprint (which was not certified by peer review) is the author/funder, who has granted bioRxiv a license to display the preprint in perpetuity. It is made available under aCC-BY 4.0 International license.

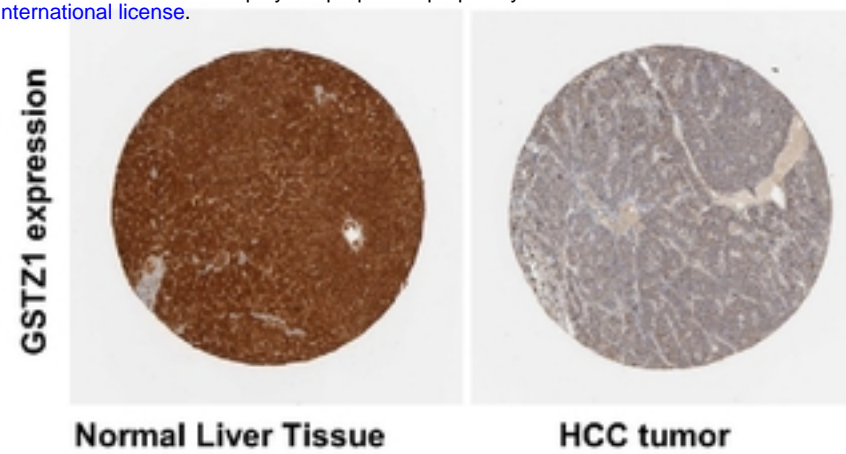

**Figure 4:** The protein expression profile of the tyrosine catabolic genes in the pan-cancer analysis (A) Quantification of HPD, HGD, GSTZ1 and FAH expression in IHC images obtained from HPA. A t-test was used to compare the expression difference between tumor and normal tissue adjacent to the tumor;  $p < 0.05$  was considered statistically significant. \* $p < 0.05$ , \*\*\* $p < 0.001$  based on the Student's t test. Values are mean  $\pm$  SEM. (B) Representative images of normal liver tissue and HCC tissue stained with antibody against GSTZ1.

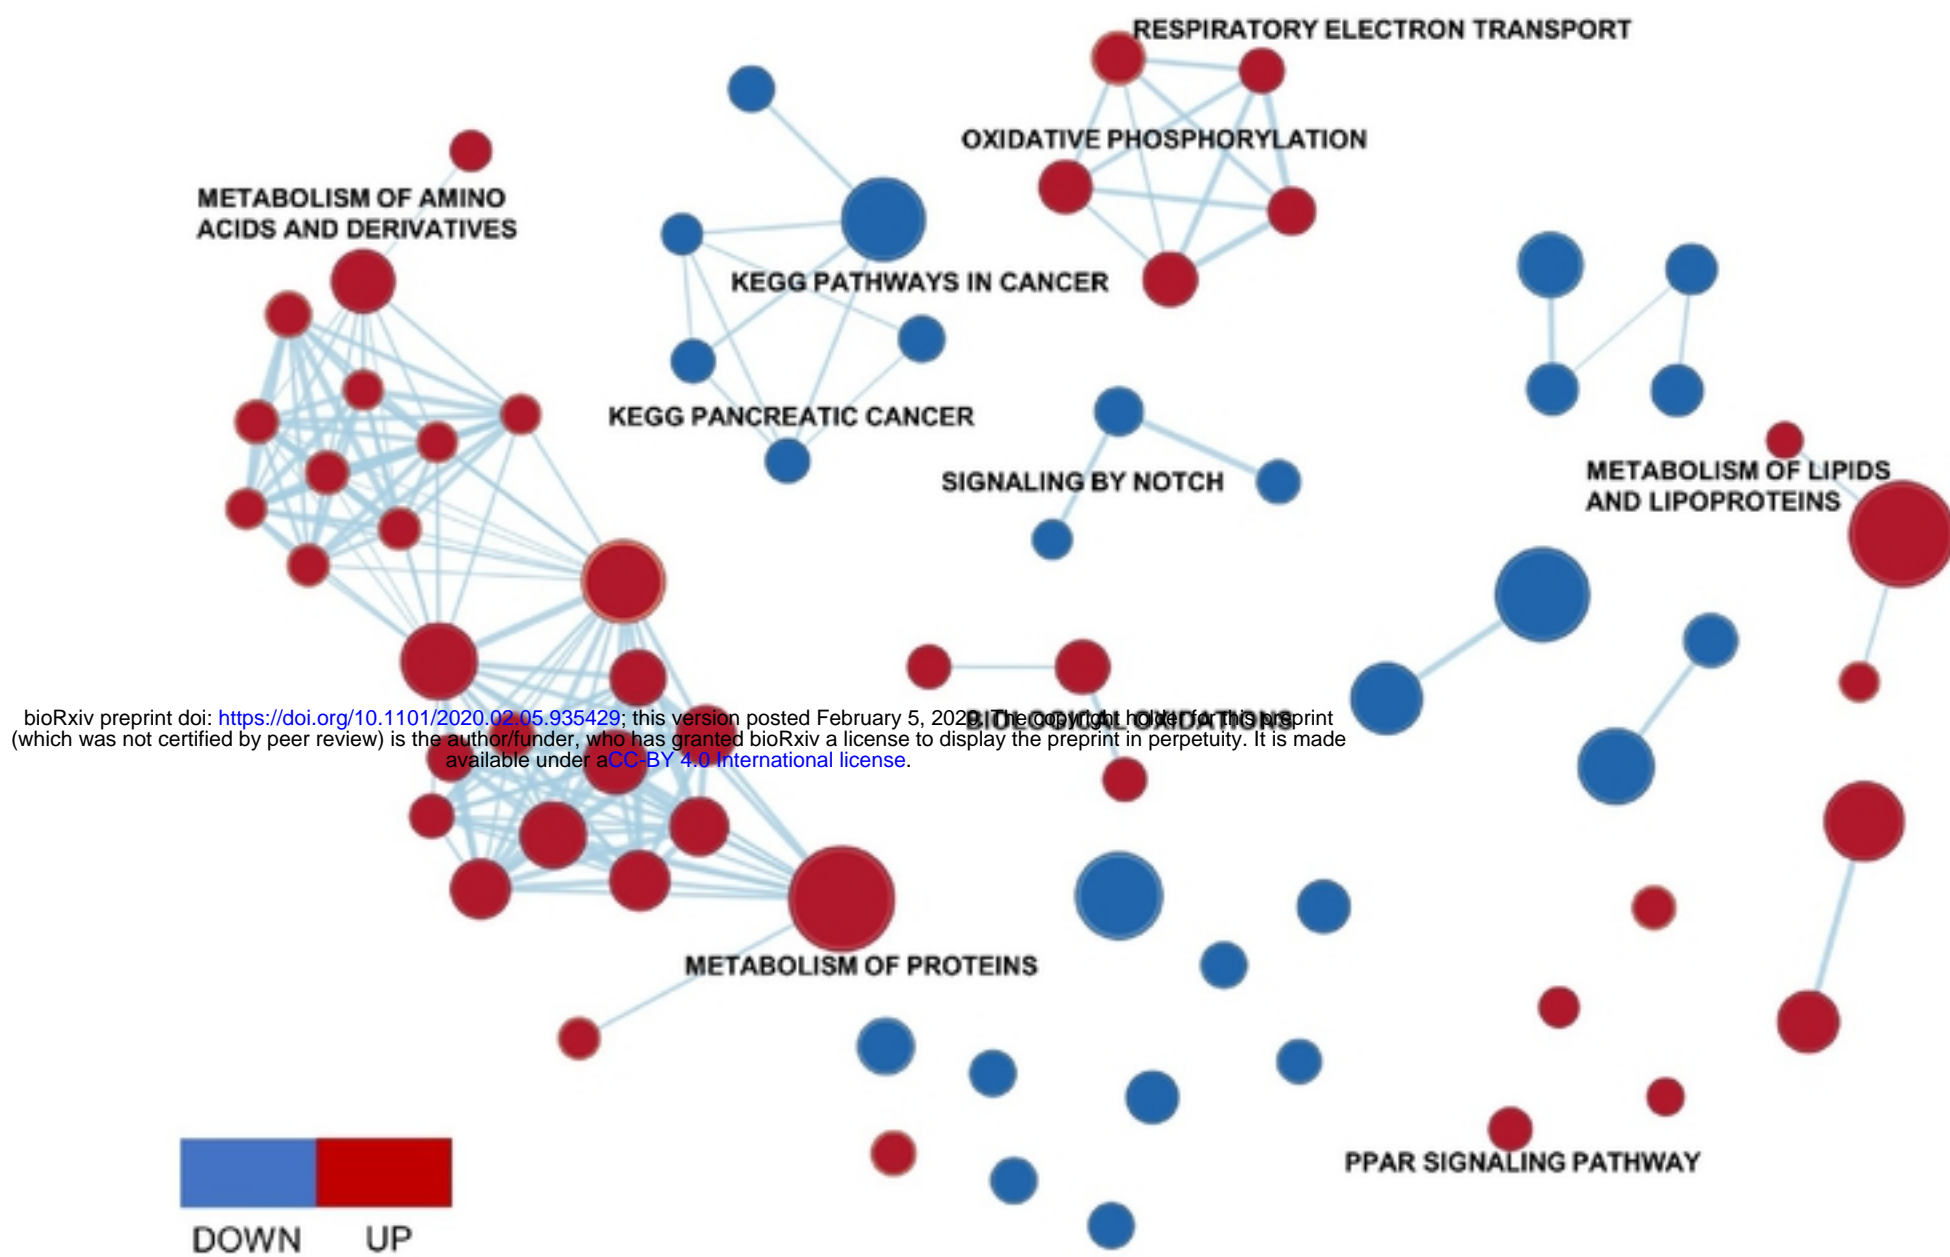

**Figure 5:** Enrichment Map of GSTZ1 overexpressed huh7 and non-targeted control: GSEA was used to obtain canonical pathway gene sets that were visualized using the Enrichment Map plug-in for Cytoscape. Each node represents a gene set with similar nodes clustered together and connected by edges with the number of known interactors between the nodes being represented by the thickness of edges. The size of each node denotes the gene set size for each specific.



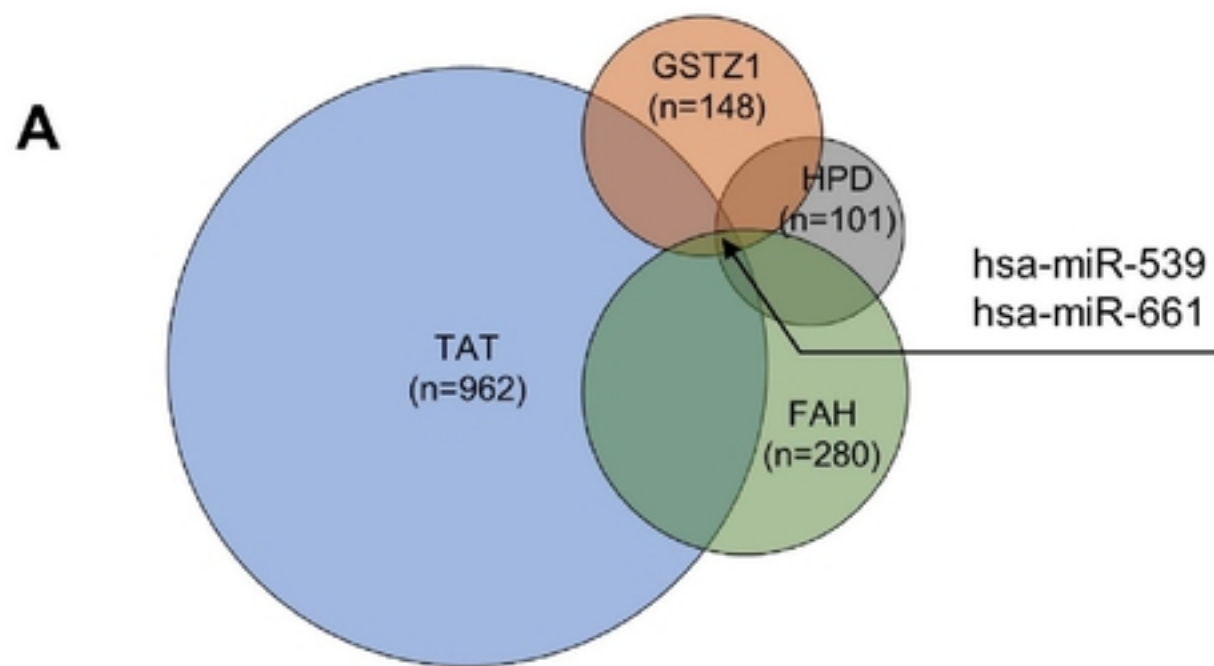

bioRxiv preprint doi: <https://doi.org/10.1101/2020.02.05.935429>; this version posted February 5, 2020. The copyright holder for this preprint (which was not certified by peer review) is the author/funder, who has granted bioRxiv a license to display the preprint in perpetuity. It is made available under aCC-BY 4.0 International license.

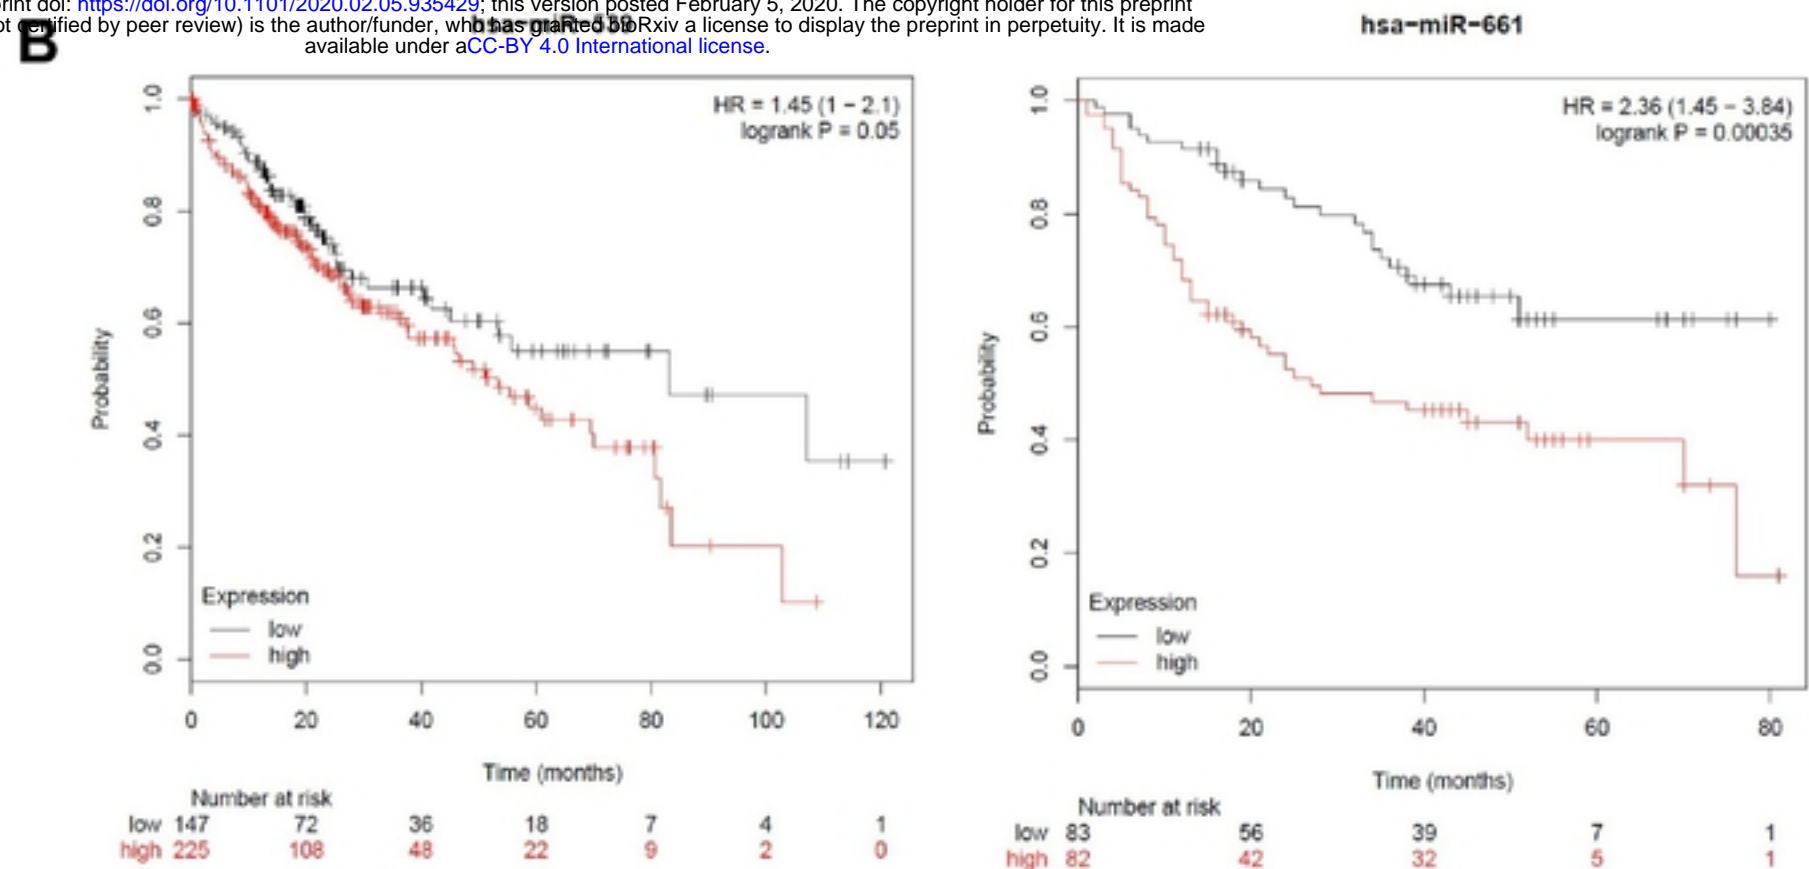

**Figure 6: Prognostic value of microRNAs that target the tyrosine catabolic genes (A) The Venn diagram demonstrated the number of predicted miRNAs that target TAT, HPD, FAH and GSTZ1 from TargetScan database. (B) Survival analysis with miR-539 and miR-661 (KM Plotter dataset). The TCGA-LIHC dataset<sup>43</sup> from Kaplan-Meier Plotter<sup>44</sup> was used to test for survival prediction capacity of miR-539 in liver cancer. The CapitalBio miRNA Array liver dataset<sup>42</sup> was used to test for survival prediction capacity of miR-661 in liver cancer. Cox regression model was used for each gene to predict relapse-free survival. Samples are divided into Low (black) and High (red) expression groups for each gene. Hazard ratio (HR) and p value for each association are shown within each plot.**
